# Supplementary material for: Cytoskeletal Proteins in Myotendinous Junctions of Human Extraocular Muscles
Source: PubMed Central journal article supplement — Invest Ophthalmol Vis Sci. 2021 Feb 17;62(2):19. doi: 10.1167/iovs.62.2.19 (PMC7900863; doi:10.1167/iovs.62.2.19), 2021-02-17
Supplement: iovs-62-2-19_s001.pdf [file iovs-62-2-19_s001.pdf]

**Table S1.** Primary and secondary antibodies used in multiple immunolabelings

| Primary antibody        |        |         | Secondary antibody                     |                          |
|-------------------------|--------|---------|----------------------------------------|--------------------------|
| Antibody                | Host   | Isotype | Antibody                               | Code number              |
| Desmin<br>D33           | Mouse  | IgG1    | Donkey anti-Mouse IgG Alexa fluor 488  | 715-545-151 <sup>†</sup> |
|                         |        |         | Donkey anti-Mouse IgG Alexa fluor 647  | 715-605-150 <sup>†</sup> |
|                         |        |         | Goat anti-Mouse IgG1 Alexa fluor 647   | A-21240 <sup>‡</sup>     |
| Nestin<br>MAB 2736      | Mouse  | IgG2a   | Goat anti-Mouse IgG2a Alexa fluor 647  | A-21241 <sup>‡</sup>     |
|                         |        |         | Goat anti-Mouse IgG2a Alexa fluor 549  | A-21135 <sup>‡</sup>     |
| Nestin<br>MAB 1259      | Mouse  | IgG1    | Donkey anti-Mouse IgG Alexa fluor 488  | 715-545-151 <sup>†</sup> |
| Vimentin V9             | Mouse  | IgG1    | Donkey anti-Mouse IgG Alexa fluor 488  | 715-545-151 <sup>†</sup> |
| Keratin 19<br>Ab15463   | Rabbit | IgG1    | Donkey anti-Rabbit IgG Alexa fluor 488 | 711-545-152 <sup>†</sup> |
|                         |        |         | Donkey anti-Rabbit IgG Alexa fluor 647 | 711-605-152 <sup>†</sup> |
| Lammin                  | Sheep  | IgG1    | Donkey anti-Sheep IgG RhRed            | 713-295-147 <sup>†</sup> |
|                         |        |         | Donkey anti-Sheep IgG 647              | 713-605-147 <sup>†</sup> |
| Tenascin                | Mouse  | IgG1    | Donkey anti-Mouse IgG Alexa fluor 488  | 715-545-151 <sup>†</sup> |
|                         |        |         | Donkey anti-Mouse IgG RhRed            | 715-295-151 <sup>†</sup> |
| MyHCI<br>BA-D5          | Mouse  | IgG2b   | Goat anti-Mouse IgG2b Alexa fluor 594  | A-21145 <sup>‡</sup>     |
|                         |        |         | Donkey anti-Mouse IgG DyLight 405      | 715-475-151 <sup>†</sup> |
| MyHCIIa<br>A4.74        | Mouse  | IgG1    | Goat anti-Mouse IgG1 Alexa fluor 594   | A-21125 <sup>‡</sup>     |
|                         |        |         | Goat anti-Mouse IgG1 Alexa fluor 647   | A-21240 <sup>‡</sup>     |
|                         |        |         | Donkey anti-Mouse IgG DyLight 405      | 715-475-151 <sup>†</sup> |
| MyHCI+IIa+eom<br>N2.261 | Mouse  | IgG1    | Donkey anti-Mouse IgG RhRed            | 715-295-151 <sup>†</sup> |

RhRed: Rhodamine Red.

†: Purchased from Jackson ImmunoResearch Europe Ltd., Newmarket, UK.

‡: Purchased from Molecular Probes, Inc., Eugene, OR, USA.
